# Supplementary material for: A Comparison of Bioactive Metabolites, Antinutrients, and Bioactivities of African Pumpkin Leaves (Momordica balsamina L.) Cooked by Different Culinary Techniques
Source: MDPI journal article supplement (doi:10.3390/molecules27061901), 2022-03-15
Supplement: s1 [file s1]

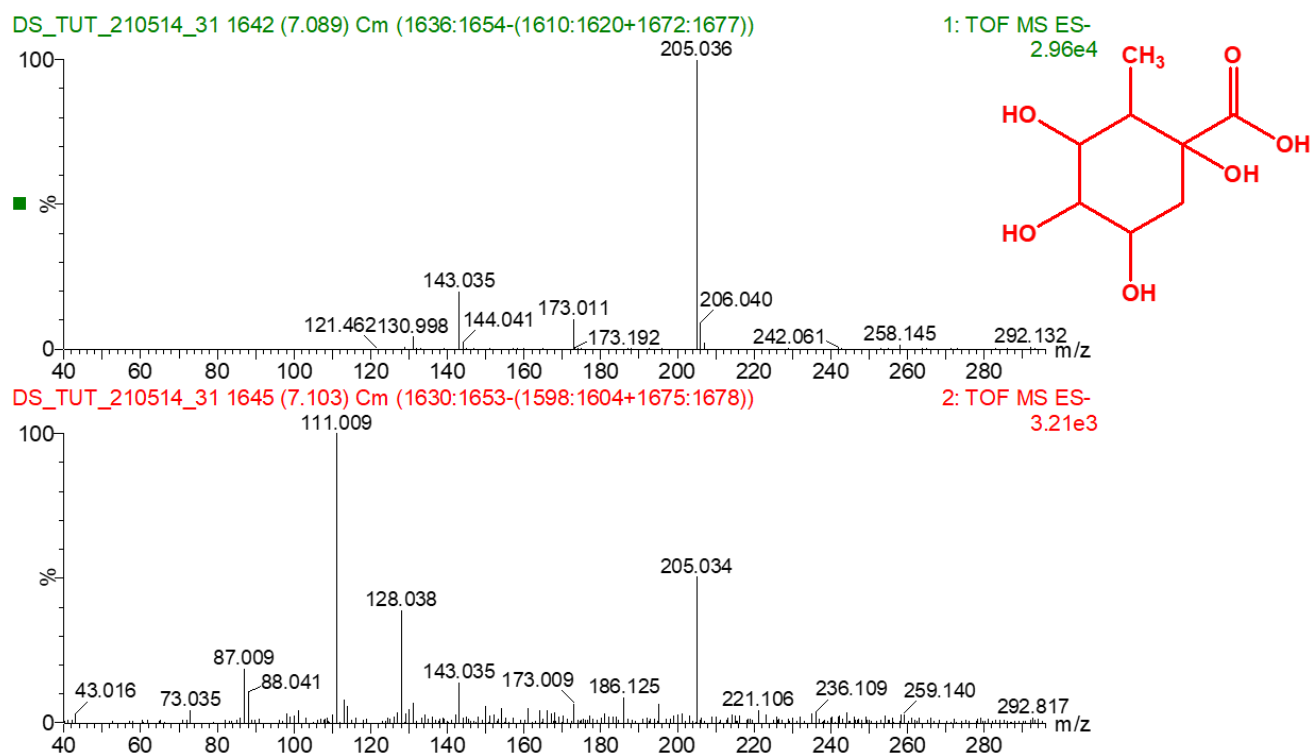

**Figure S1.** Showing the chemical structure of methyl quinic acid superimposed on an overlay of its MS and MS/MS fragmentation pattern.

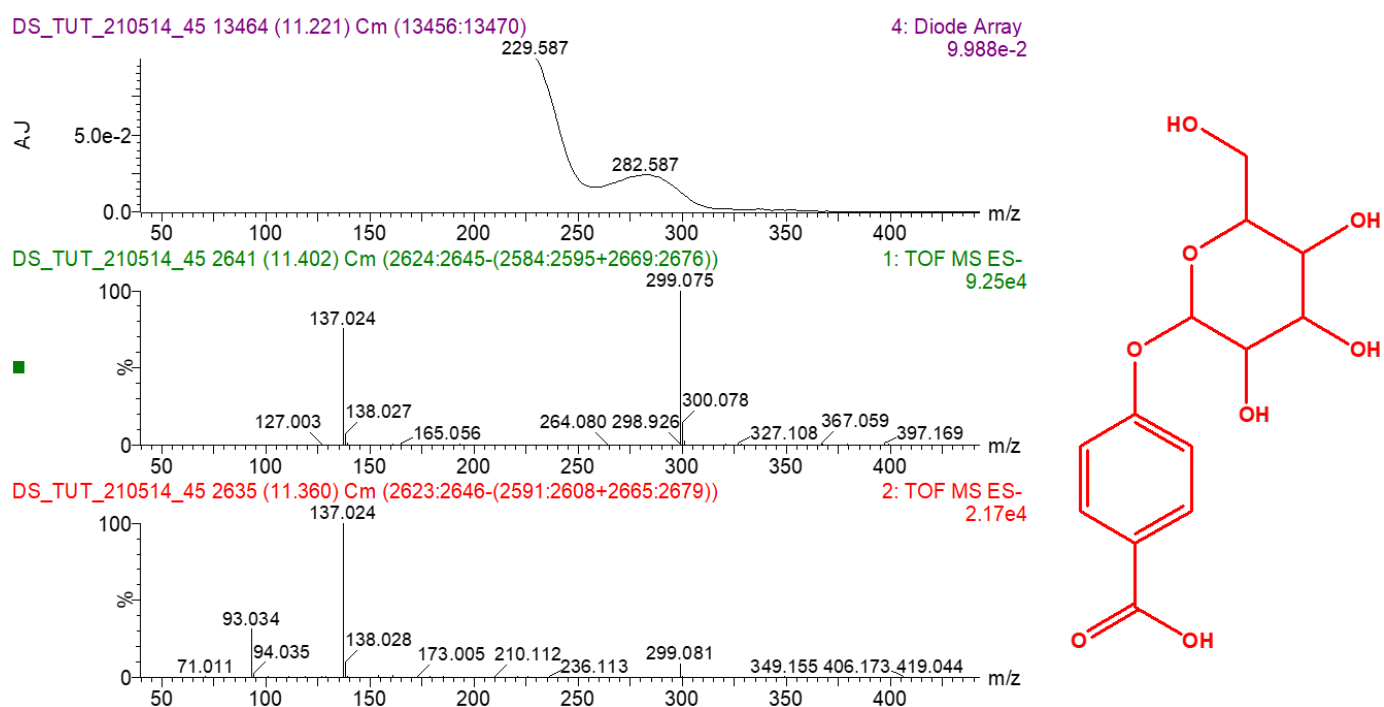

**Figure S2.** Showing an overlay of the UV spectrum, MS and MS/MS fragmentation pattern of pseudolaroside A next to its chemical structure.

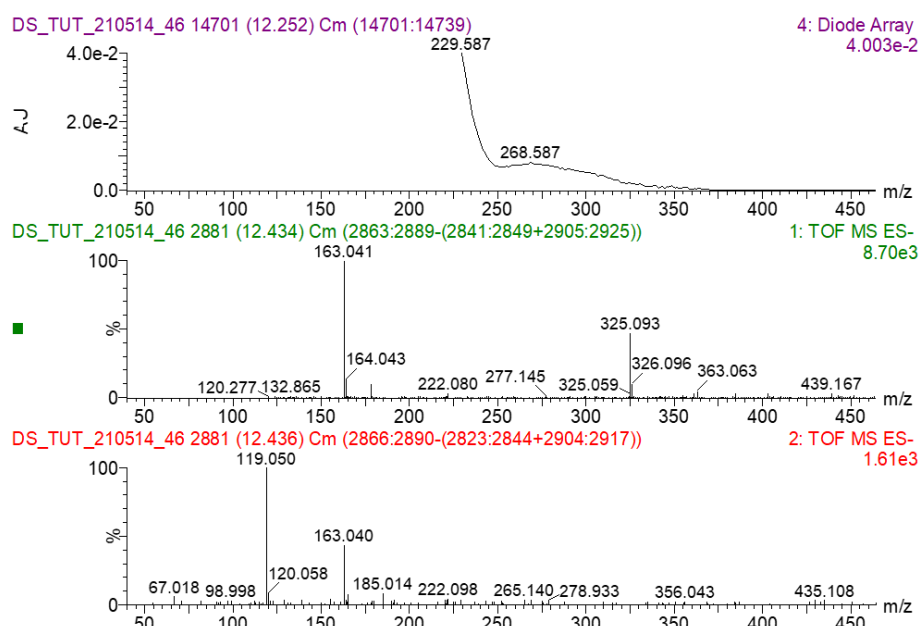

**Figure S3.** Showing an overlay of the UV spectrum, MS and MS/MS fragmentation pattern of melilotoside next to its chemical structure.

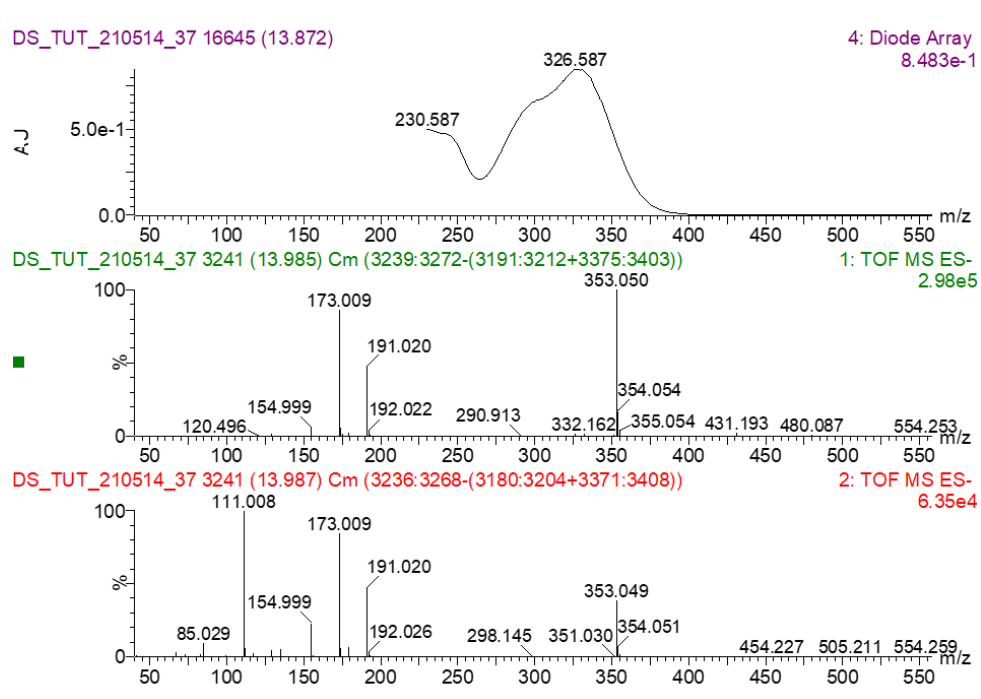

**Figure S4.** Showing an overlay of the UV spectrum, MS and MS/MS fragmentation pattern of cryptochlorogenic acid next to its chemical structure.

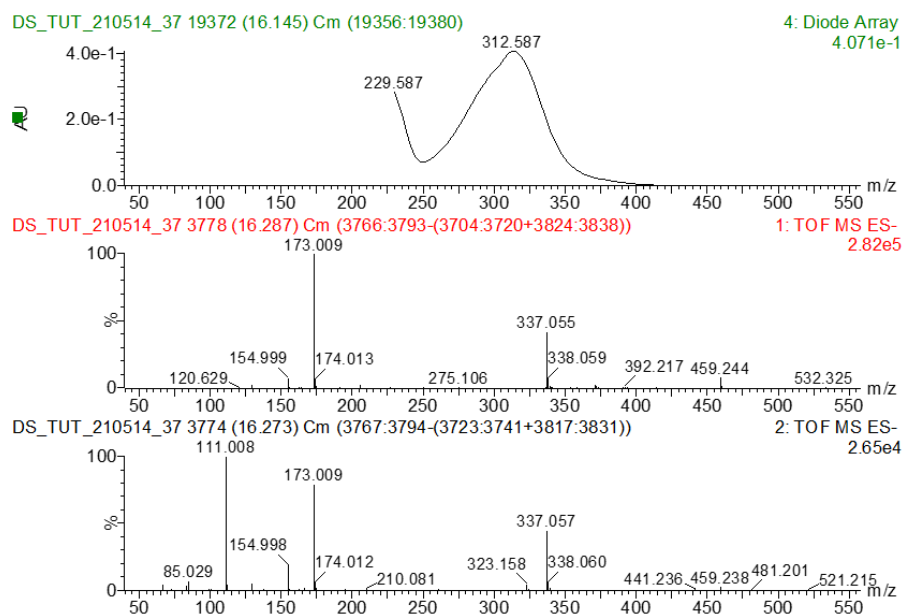

**Figure S5.** Showing an overlay of the UV spectrum, MS and MS/MS fragmentation pattern for cis-4-coumaroylquinic acid next to its chemical structure.

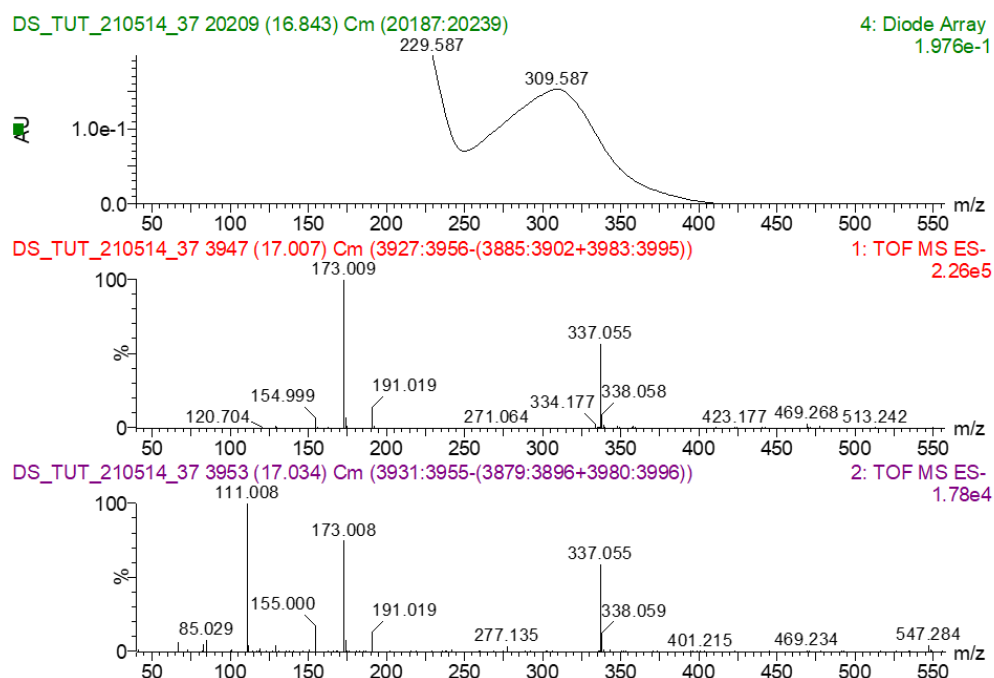

**Figure S6.** Showing an overlay of the UV spectrum, MS and MS/MS fragmentation pattern for trans-4-coumaroylquinic acid next to its chemical structure.

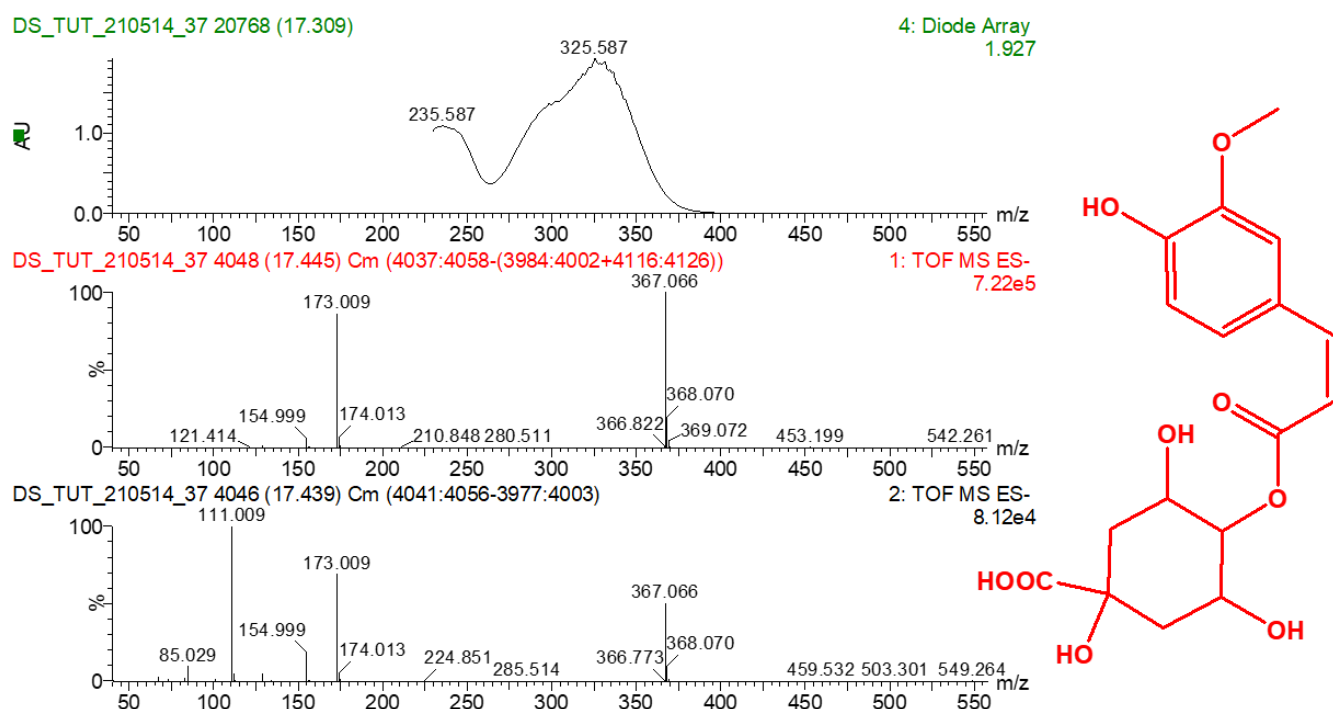

**Figure S7.** Showing an overlay of the UV spectrum, MS and MS/MS fragmentation pattern for cis-4-feruloylquinic acid next to its chemical structure.

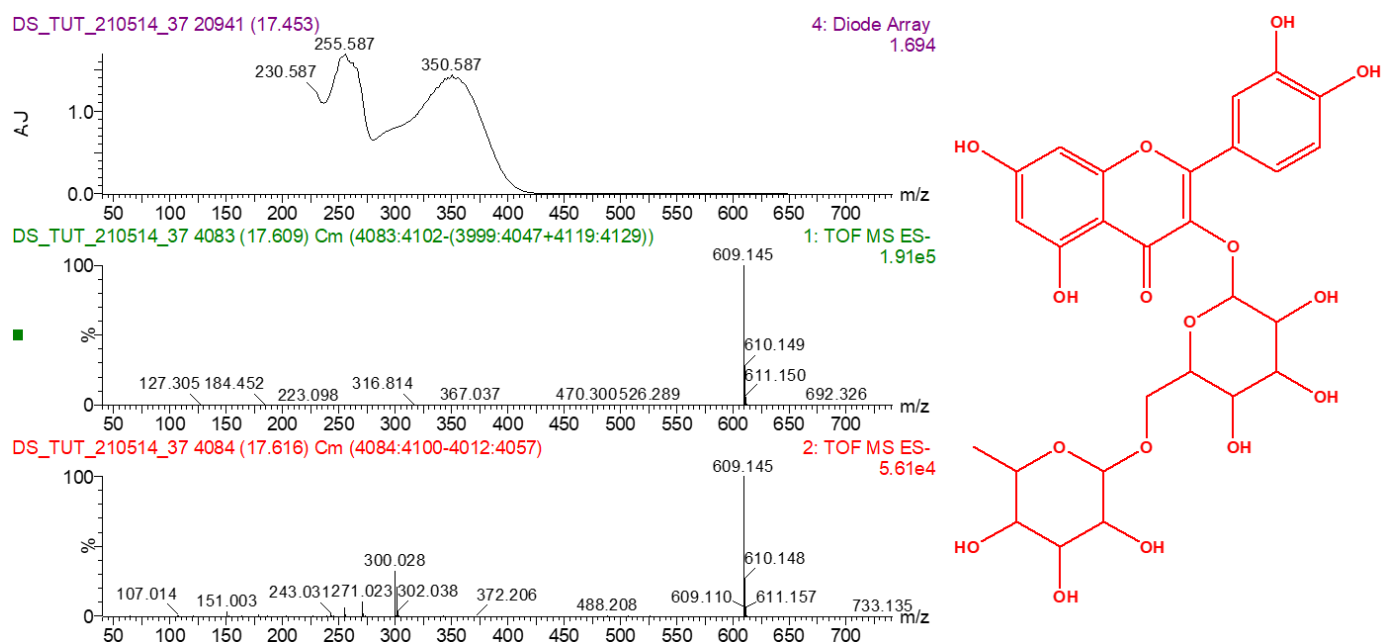

**Figure S8.** Showing an overlay of the UV spectrum, MS and MS/MS fragmentation pattern of rutin next to its chemical structure.

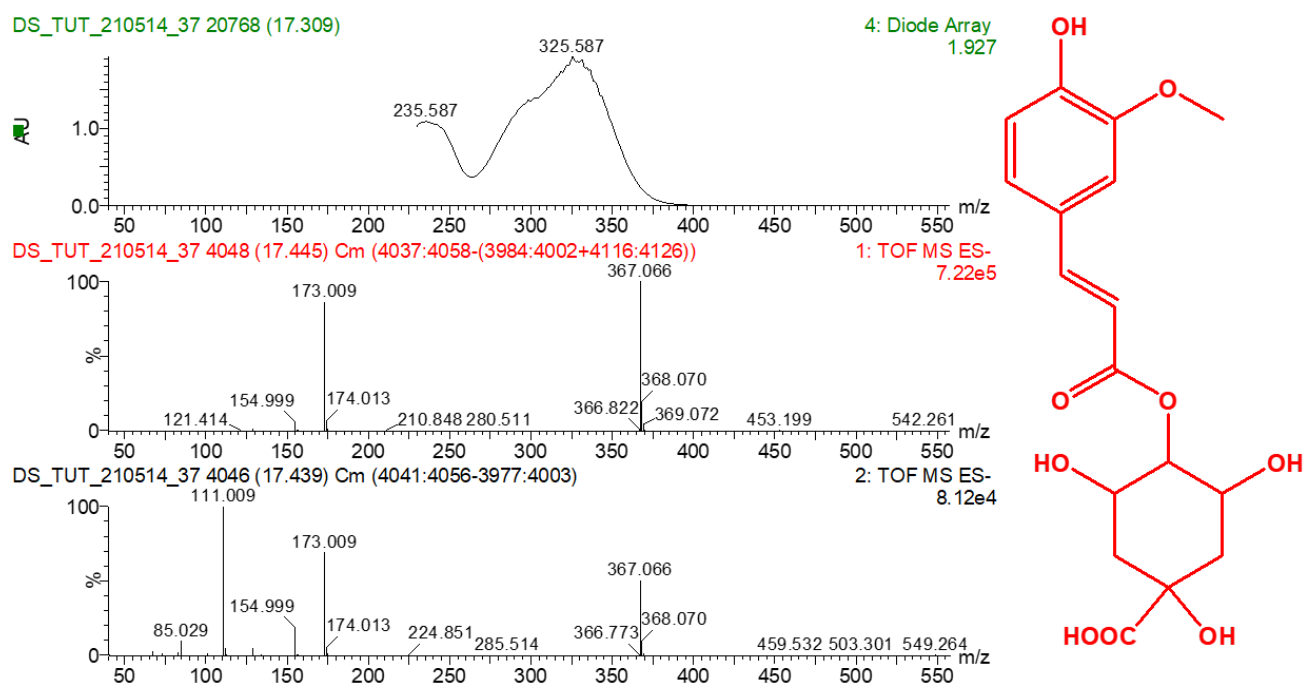

**Figure S9.** Showing an overlay of the UV spectrum, MS and MS/MS fragmentation pattern of trans 4 feruloylquinic acid next to its chemical structure.

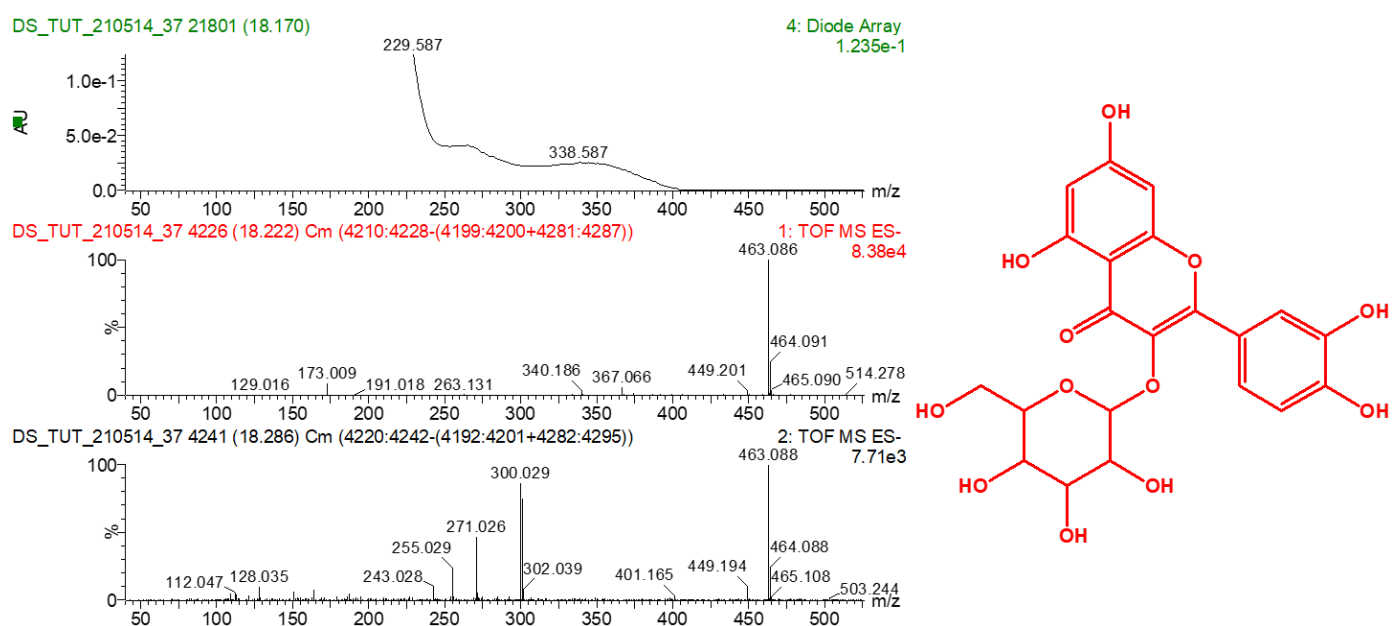

**Figure S10.** Showing an overlay of the UV spectrum, MS and MS/MS fragmentation pattern of quercetin 3 galactoside next to its chemical structure.

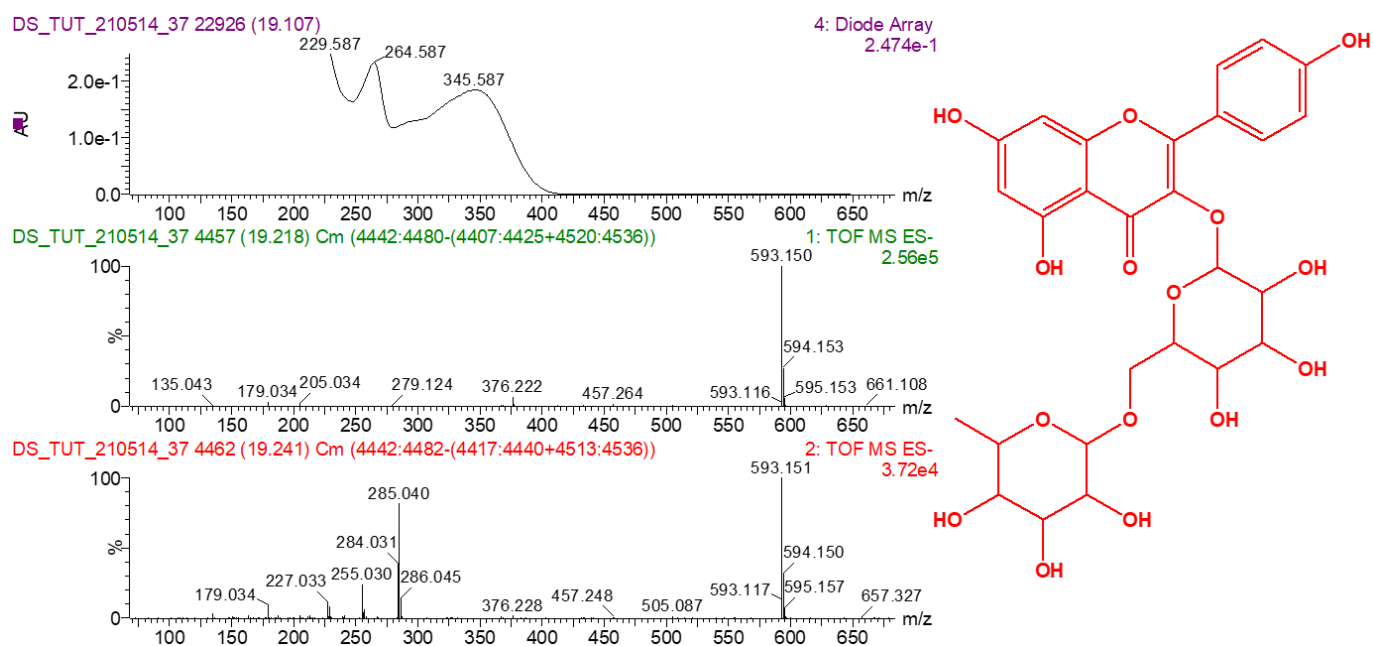

**Figure S11.** Showing an overlay of the UV spectrum, MS and MS/MS fragmentation pattern of nicotiflorin next to its chemical structure.

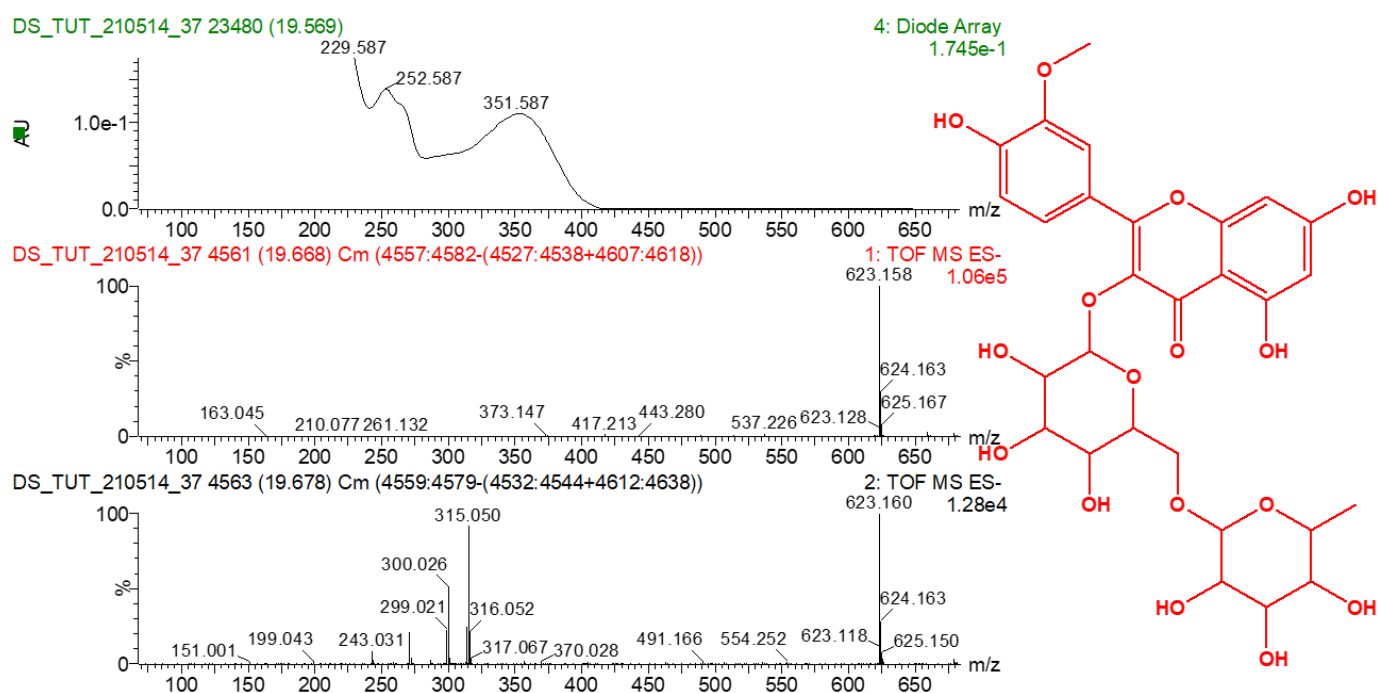

**Figure S12.** Showing an overlay of the UV spectrum, MS and MS/MS fragmentation pattern of nicotiflorin next to its chemical structure.

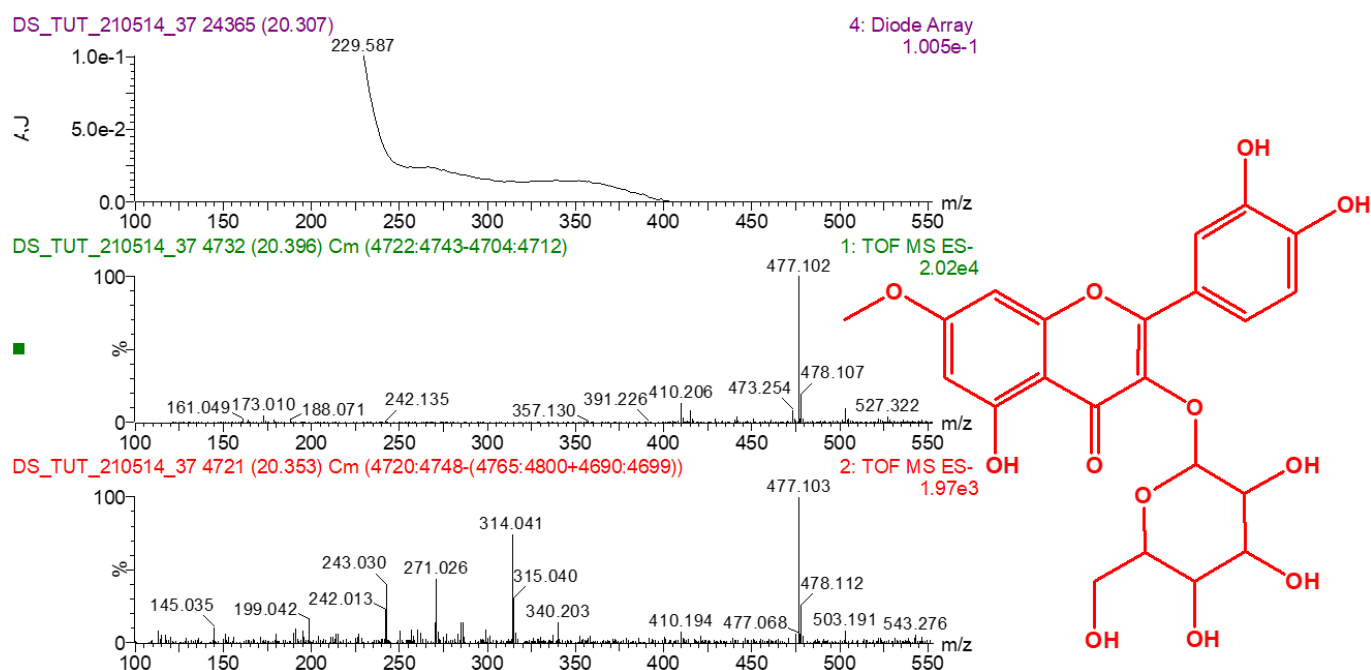

**Figure S13.** Showing an overlay of the UV spectrum, MS and MS/MS fragmentation pattern of rhamnetin-3-O-glucoside next to its chemical structure.

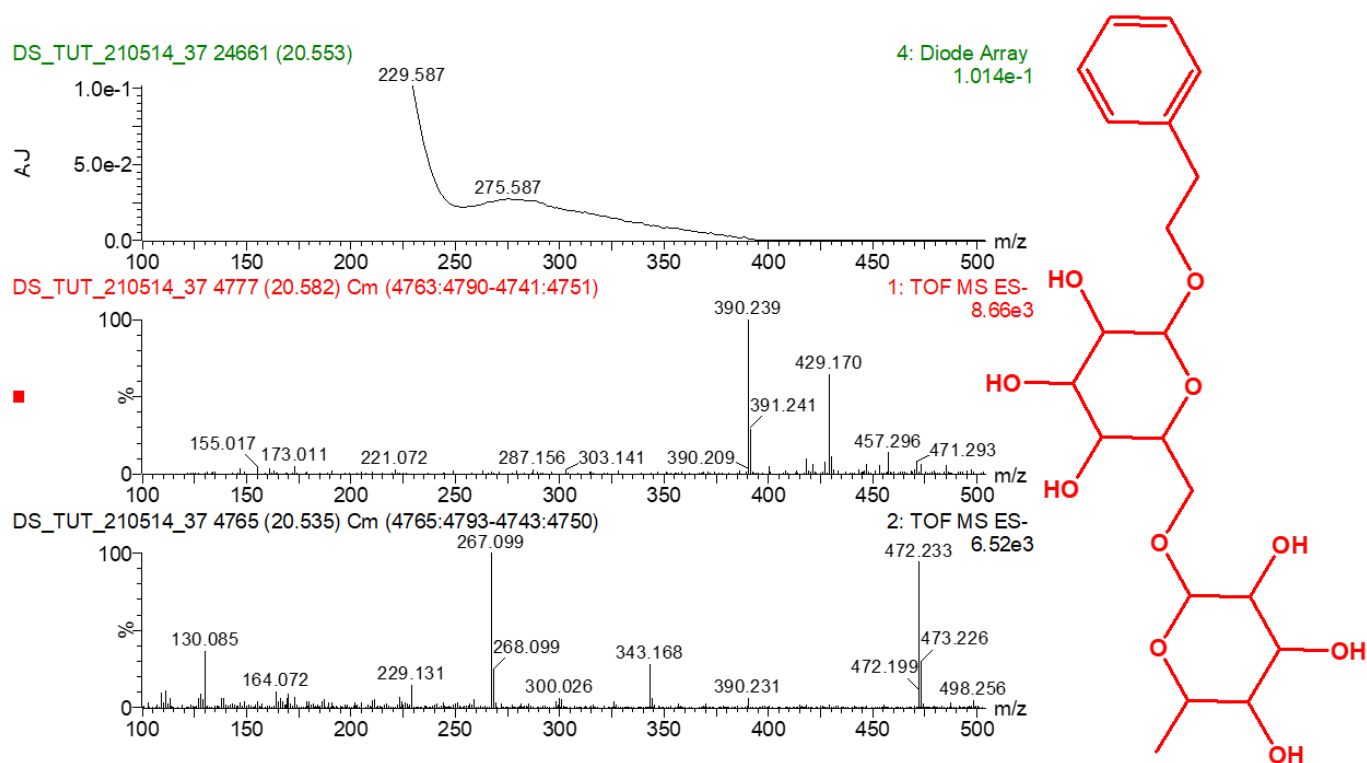

**Figure S14.** Showing an overlay of the UV spectrum, MS and MS/MS fragmentation pattern of phenethyl rutinoside next to its chemical structure.
